# Supplementary material for: Photovoltaic characteristics and stability of flexible dye-sensitized solar cells on ITO/PEN substrates
Source: Royal Society of Chemistry journal article supplement (doi:10.1039/c3ra45508d), 2013-11-28
Supplement: c3ra45508d.pdf [file c3ra45508d.pdf]

## Supporting information

# Photovoltaic Characteristics and Stability of Flexible Dye-Sensitized Solar Cells on ITO/PEN Substrates

Yu Han,<sup>a</sup> Jennifer M. Pringle,<sup>b</sup> Yi-Bing Cheng<sup>a\*</sup>

<sup>a</sup>Department of Materials Engineering, Monash University, Clayton, Victoria 3800, Australia

<sup>b</sup>Australian Research Council Centre of Excellence for Electromaterials Science, Deakin University, Melbourne Burwood Campus, 221 Burwood Highway, Burwood, VIC 3125, Australia

\*Corresponding author. Email: yibing.cheng@monash.edu, Phone: +61 (0)3 990 54930

## 1. I-V curves of the DSSCs

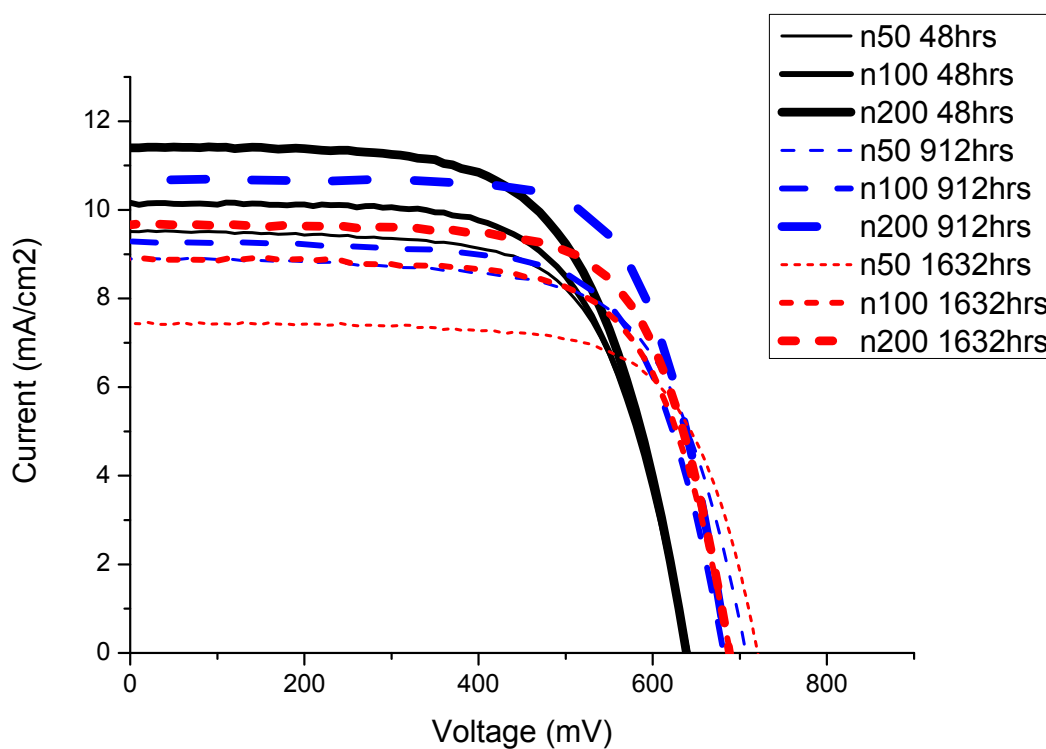

Figure S1 I-V curves for samples n50, n100 and n200 at different aging times

## 2. EIS of the DSSCs

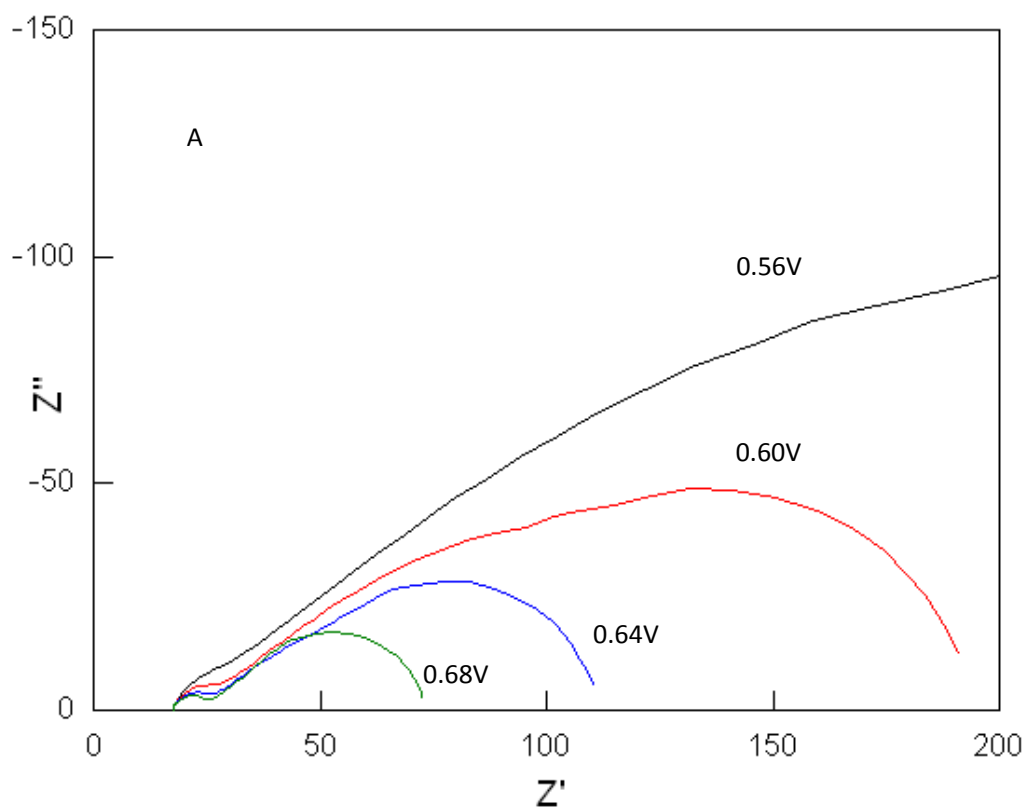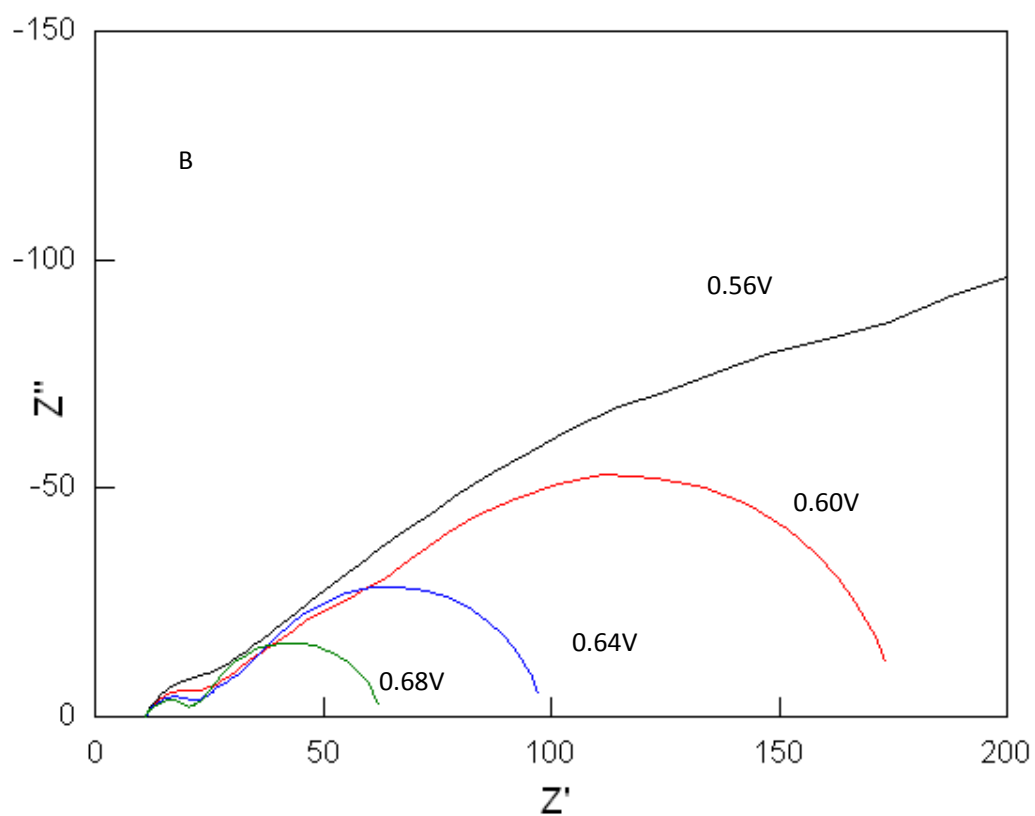

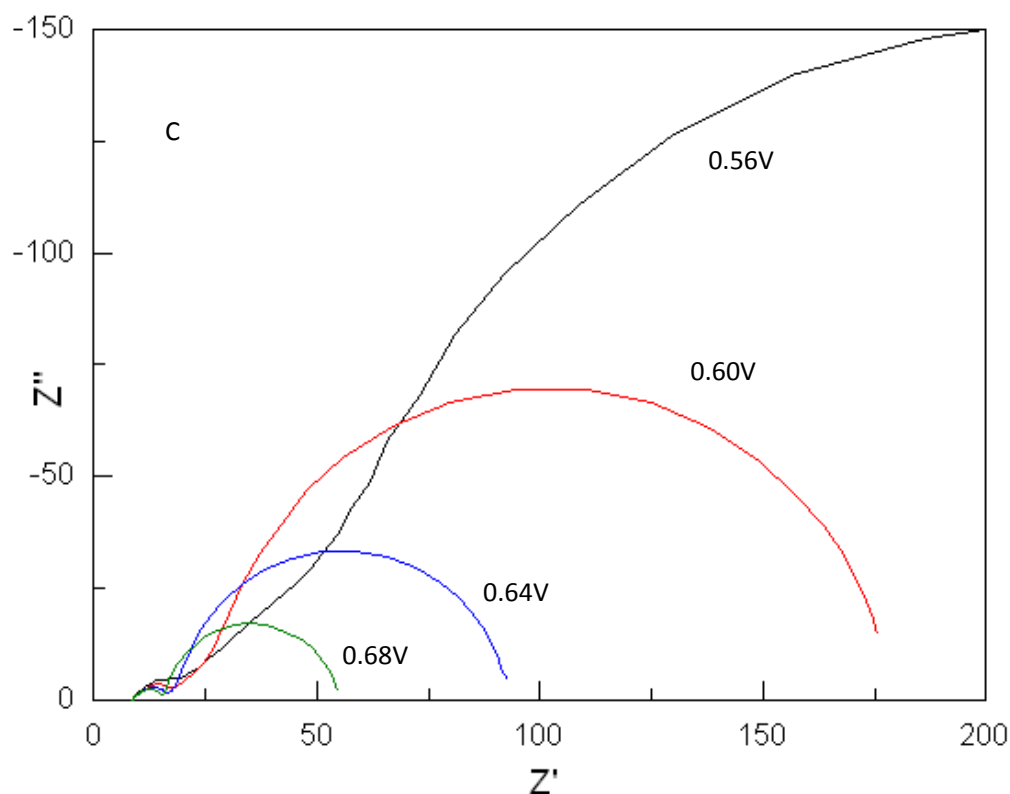

Figure S2 EIS spectra obtained for samples (A) n50, (B) n100 and (C) n200 at the aging time of 48 hours at different bias potentials (0.56V, 0.60V, 0.64V and 0.68V)

Table S1 EIS fitting results for samples n50, n100 and n200 at the aging time of 48 hours

| <b>Sample n50</b>         |               |                    |                       |      |
|---------------------------|---------------|--------------------|-----------------------|------|
| <b>Bias potential (V)</b> | $C_{\mu}$ (F) | $R_t$ ( $\Omega$ ) | $R_{ct}$ ( $\Omega$ ) | Ln/L |
| <b>0.56</b>               | 0.001196      | 654.3              | 187.1                 | 0.53 |
| <b>0.60</b>               | 0.002026      | 243.9              | 107                   | 0.66 |
| <b>0.64</b>               | 0.002251      | 78.99              | 65.99                 | 0.91 |
| <b>0.68</b>               | 0.00266       | 29.25              | 40.87                 | 1.18 |
| <b>Sample n100</b>        |               |                    |                       |      |
| <b>Bias potential (V)</b> | $C_{\mu}$ (F) | $R_t$ ( $\Omega$ ) | $R_{ct}$ ( $\Omega$ ) | Ln/L |
| <b>0.56</b>               | 0.001315      | 464.2              | 220.7                 | 0.68 |
| <b>0.60</b>               | 0.001496      | 125.9              | 122.6                 | 0.98 |
| <b>0.64</b>               | 0.001811      | 43.14              | 65.41                 | 1.23 |
| <b>0.68</b>               | 0.002376      | 15.96              | 37.89                 | 1.54 |
| <b>Sample n200</b>        |               |                    |                       |      |
| <b>Bias potential (V)</b> | $C_{\mu}$ (F) | $R_t$ ( $\Omega$ ) | $R_{ct}$ ( $\Omega$ ) | Ln/L |
| <b>0.56</b>               | 0.00079       | 113.2              | 324.8                 | 1.69 |
| <b>0.60</b>               | 0.001035      | 32.23              | 155.4                 | 2.19 |
| <b>0.64</b>               | 0.001407      | 10.94              | 74.44                 | 2.60 |
| <b>0.68</b>               | 0.002008      | 4.844              | 38.62                 | 2.82 |

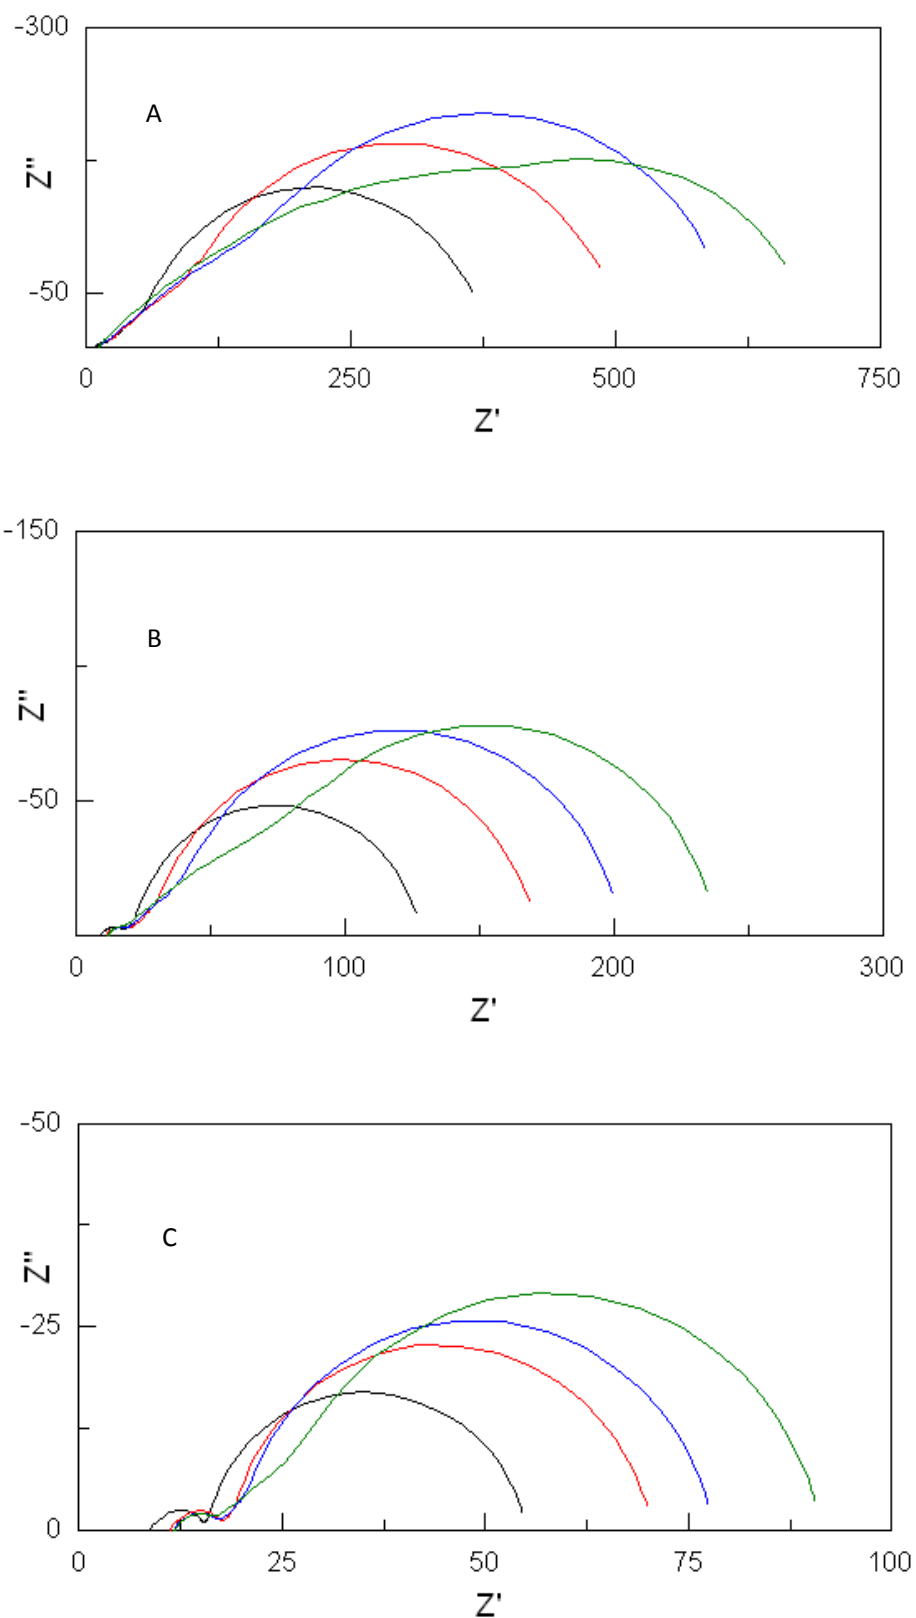

Figure S3 EIS spectra of sample n200, measured in the dark at the bias potentials (A) 0.56V; (B) 0.62V; (C) 0.68V, and different aging times (black line) 48 hours; (red line) 168 hours; (blue line) 408 hours; (green line) 912 hours respectively.

Table S2 EIS fitting results for sample n200 at the same bias potential but different aging times

| <b>Sample n200, measured at bias potential 0.56V</b> |                                 |                                               |                                                  |                           |
|------------------------------------------------------|---------------------------------|-----------------------------------------------|--------------------------------------------------|---------------------------|
| <b>Aging time</b>                                    | <b><math>C_{\mu}</math> (F)</b> | <b><math>R_t</math> (<math>\Omega</math>)</b> | <b><math>R_{ct}</math> (<math>\Omega</math>)</b> | <b><math>\ln/L</math></b> |
| After 48 hours                                       | 0.000789                        | 113.2                                         | 324.8                                            | 1.69                      |
| After 168 hours                                      | 0.000733                        | 238                                           | 411.4                                            | 1.31                      |
| After 408 hours                                      | 0.000761                        | 427.8                                         | 479.9                                            | 1.06                      |
| After 912 hours                                      | 0.000748                        | 1017                                          | 374.5                                            | 0.61                      |
| <b>Sample n200, measured at bias potential 0.62V</b> |                                 |                                               |                                                  |                           |
| <b>Aging time</b>                                    | <b><math>C_{\mu}</math> (F)</b> | <b><math>R_t</math> (<math>\Omega</math>)</b> | <b><math>R_{ct}</math> (<math>\Omega</math>)</b> | <b><math>\ln/L</math></b> |
| After 48 hours                                       | 0.001192                        | 18.46                                         | 106.4                                            | 2.40                      |
| After 168 hours                                      | 0.00101                         | 36.17                                         | 141.2                                            | 1.98                      |
| After 408 hours                                      | 0.000924                        | 65.11                                         | 164.2                                            | 1.59                      |
| After 912 hours                                      | 0.001024                        | 173.6                                         | 174.5                                            | 1.00                      |
| <b>Sample n200, measured at bias potential 0.68V</b> |                                 |                                               |                                                  |                           |
| <b>Aging time</b>                                    | <b><math>C_{\mu}</math> (F)</b> | <b><math>R_t</math> (<math>\Omega</math>)</b> | <b><math>R_{ct}</math> (<math>\Omega</math>)</b> | <b><math>\ln/L</math></b> |
| After 48 hours                                       | 0.002008                        | 4.844                                         | 38.62                                            | 2.82                      |
| After 168 hours                                      | 0.001656                        | 7.509                                         | 51.24                                            | 2.61                      |
| After 408 hours                                      | 0.001425                        | 12.15                                         | 57.81                                            | 2.18                      |
| After 912 hours                                      | 0.001217                        | 32                                            | 64.93                                            | 1.42                      |
